# Supplementary material
Source: HighWire-hosted journal article supplement (https://jitc.bmj.com/content/10/1/e003133)
Supplement: inline-supplementary-material-1 [file inline-supplementary-material-1.xlsx]

## Sheet: HH&HCC
Supplementary Table 1. Demographic and clinical characteristics of individuals enrolled in this study
Demographic and clinical characteristics of patients with hepatic hemangioma and hepatocellular carcinoma enrolled in this study
FCS file name	Patient ID	Sample ID	Age	Gender	Cirrhosis	HBV/HCV infected	Diagnosis	AFP (ng/ml)	BCLC stage	Treatments before immune checkpoint blockade therapy	Immune checkpoint inhibitor antibody	Sample type	Processing buffer	Sampling time	Cell counts for CYTOF (*10^6)	Available cell counts
0071_PBMC_11_bef.fcs	HH1	HH1	70	Female	No	Uninfected	HH	1.3	NA	Surgery	NA	PBMC	ACK	20170303	1	226754
0076_PBMC_12_bef.fcs	HCC8	HCC8	63	Male	Yes	HBV infected	HCC	5.2	A	Surgery	NA	PBMC	ACK	20170308	1	117943
0107_PBMC_23.fcs	HCC1	HCC1	42	Female	No	HBV infected	HCC	48	A	Surgery	NA	PBMC	ACK	20170410	0.35	52824
0128_PBMC_27_2.fcs	HCC2	HCC2	54	Female	Yes	HBV infected	HCC	6273.7	A	Surgery	NA	PBMC	ACK	20170418	1	332927
0129_PBMC_28_2.fcs	HCC21	HCC21	57	Female	Yes	Uninfected	HCC	11.3	A	Surgery	NA	PBMC	ACK	20170419	1	505705
0131_PBMC_29.fcs	HH2	HH2	54	Female	No	Uninfected	HH	3.3	NA	Surgery	NA	PBMC	ACK	20170421	1	840594
0132_PBMC_30.fcs	HH3	HH3	50	Male	No	Uninfected	HH	1.3	NA	Surgery	NA	PBMC	ACK	20170421	1	564440
0145_PBMC_31.fcs	HCC3	HCC3	54	Male	Yes	HBV infected	HCC	55.2	A	Surgery	NA	PBMC	ACK	20170426	1	696222
0146_PBMC_32.fcs	HH4	HH4	63	Female	No	Uninfected	HH	5.6	NA	Surgery	NA	PBMC	ACK	20170426	1	190994
0146_PBMC_33_1.fcs	HH5	HH5	60	Female	No	HBV infected	HH	1.8	NA	Surgery	NA	PBMC	ACK	20170426	1	169924
0159_PBMC_34.fcs	HCC22	HCC22	48	Male	No	Uninfected	HCC	10.2	A	Surgery	NA	PBMC	ACK	20170505	0.21	161377
0167_PBMC_35.fcs	HCC4	HCC4	44	Male	No	HBV infected	HCC	59	A	Surgery	NA	PBMC	ACK	20170508	1	140012
0168_PBMC_36.fcs	HCC9	HCC9	67	Male	No	HBV infected	HCC	2.8	A	Surgery	NA	PBMC	ACK	20170508	1	184153
0170_PBMC_37.fcs	HCC5	HCC5	54	Female	No	HBV infected	HCC	188	A	Surgery	NA	PBMC	ACK	20170508	1	153572
0241_PBMC_38.CBDD.fcs	HCC10	HCC10	46	Male	No	HBV infected	HCC	7.8	A	Surgery	NA	PBMC	ACK	20170711	1	127909
0250_PBMC_42.CBDD.fcs	HCC6	HCC6	63	Male	Yes	HBV infected	HCC	135.7	A	Surgery	NA	PBMC	ACK	20170712	1	128517
0250_PBMC_44.CBDD.fcs	HCC23	HCC23	63	Male	No	Uninfected	HCC	2.2	A	Surgery	NA	PBMC	ACK	20170712	1	124508
0259_PBMC_45.CBDD.fcs	HCC24	HCC24	75	Female	No	Uninfected	HCC	3.9	A	Surgery	NA	PBMC	ACK	20170712	1	127407
0259_PBMC_46.CBDD.fcs	HCC25	HCC25	51	Male	No	Uninfected	HCC	1.5	A	Surgery	NA	PBMC	ACK	20170712	1	118687
0264_PBMC_49.CBDD.fcs	HH6	HH6	48	Female	No	HBV infected	HH	1.8	NA	Surgery	NA	PBMC	ACK	20170718	1	90581
0269_PBMC_50.CBDD.fcs	HH7	HH7	51	Female	No	Uninfected	HH	2.6	NA	Surgery	NA	PBMC	ACK	20170719	1	162928
0269_PBMC_51.CBDD.fcs	HH8	HH8	60	Female	No	Uninfected	HH	5.7	NA	Surgery	NA	PBMC	ACK	20170719	1	148485
0274_PBMC_54.CBDD.fcs	HH9	HH9	54	Female	No	Uninfected	HH	2.4	NA	Surgery	NA	PBMC	ACK	20170721	1	133656
0284_PBMC_56.CBDD.fcs	HCC11	HCC11	73	Male	Yes	HBV infected	HCC	6.1	A	Surgery	NA	PBMC	ACK	20170726	1	225302
0315_PBMC_57.CBDD.fcs	HCC7	HCC7	44	Male	Yes	Uninfected	HCC	16054	A	Surgery	NA	PBMC	ACK	20170810	1	413395
0321_PBMC_58.CBDD.fcs	HCC12	HCC12	61	Male	No	HBV infected	HCC	4.3	A	Surgery	NA	PBMC	ACK	20170811	1	251584
0567_PBMC_62.CBDD.fcs	HH10	HH10	53	Male	No	Uninfected	HH	3.2	NA	Surgery	NA	PBMC	ACK	20171128	0.19	43338
0575_PBMC_72.CBDD.fcs	HH12	HH12	48	Female	No	Uninfected	HH	1.1	NA	Surgery	NA	PBMC	ACK	20171220	1.2	205644
0592_PBMC_78.CBDD.fcs	HCC27	HCC27	63	Male	No	Uninfected	HCC	12.1	A	Surgery	NA	PBMC	ACK	20171226	1	130155
0600_PBMC_79.CBDD.fcs	HH13	HH13	30	Female	No	Uninfected	HH	4.9	NA	Surgery	NA	PBMC	ACK	20171229	1.1	385886
0641_PBMC_82.CBDD.fcs	HH14	HH14	59	Female	No	Uninfected	HH	3.2	NA	Surgery	NA	PBMC	ACK	20180115	1	189609
0641_PBMC_83.CBDD.fcs	HCC30	HCC30	80	Male	No	HBV infected	HCC	38.7	A	Surgery	NA	PBMC	ACK	20180115	1	180410
0650_PBMC_85.CBDD.fcs	HH15	HH15	35	Male	No	Uninfected	HH	1.7	NA	Surgery	NA	PBMC	ACK	20180117	1	278244
0657_PBMC_87.CBDD.fcs	HCC28	HCC28	63	Male	No	HBV infected	HCC	4.8	A	Surgery	NA	PBMC	ACK	20180119	1	269754
0674_PBMC_88.CBDD.fcs	HCC29	HCC29	52	Male	Yes	HBV infected	HCC	17608	A	Surgery	NA	PBMC	ACK	20180124	1	283221
0692_PBMC_93.CBDD.fcs	HCC19	HCC19	73	Female	Yes	HBV infected	HCC	169.2	A	Surgery	NA	PBMC	ACK	20180130	1	251517
0708_PBMC_95.CBDD.fcs	HCC20	HCC20	71	Male	Yes	HBV infected	HCC	16.6	A	Surgery	NA	PBMC	ACK	20180202	1	212577
0725_PBMC_96.CBDD.fcs	HCC18	HCC18	47	Male	No	HBV infected	HCC	4.3	A	Surgery	NA	PBMC	ACK	20180206	1	174781
0740_PBMC_97.CBDD.fcs	HCC15	HCC15	53	Male	Yes	HBV infected	HCC	54325.1	A	Surgery	NA	PBMC	ACK	20180208	1	201533
0744_PBMC_99.CBDD.fcs	HCC16	HCC16	60	Male	Yes	HBV infected	HCC	2562.5	A	Surgery	NA	PBMC	ACK	20180209	1	241885
0768_PBMC_106.CBDD.fcs	HCC17	HCC17	45	Male	No	HBV infected	HCC	9.2	A	Surgery	NA	PBMC	ACK	20180307	1	175543
0771_PBMC_107.CBDD.fcs	HCC31	HCC31	53	Male	No	HBV infected	HCC	3.1	A	Surgery	NA	PBMC	ACK	20180308	1	165372
HR1W0.fcs	C1	C1-0	46	Male	No	HBV infected	HCC	61.4	C	TACE and Chemotherapy	camrelizumab	PBMC	ACK	20170509	0.7	29014
HR1W1.fcs	C1	C1-1	46	Male	No	HBV infected	HCC	NA	C	TACE and Chemotherapy	camrelizumab	PBMC	ACK	20170515	0.8	190886
HR1W12.fcs	C1	C1-5	46	Male	No	HBV infected	HCC	201.3	C	TACE and Chemotherapy	camrelizumab	PBMC	ACK	20170731	NA	153930
HR1W18.fcs	C1	C1-6	46	Male	No	HBV infected	HCC	3.6	C	TACE and Chemotherapy	camrelizumab	PBMC	ACK	20170920	0.2	50296
HR1W3.fcs	C1	C1-2	46	Male	No	HBV infected	HCC	NA	C	TACE and Chemotherapy	camrelizumab	PBMC	ACK	20170531	NA	193842
HR1W6.fcs	C1	C1-3	46	Male	No	HBV infected	HCC	28291.2	C	TACE and Chemotherapy	camrelizumab	PBMC	ACK	20170620	0.8	101182
HR1W9.fcs	C1	C1-4	46	Male	No	HBV infected	HCC	NA	C	TACE and Chemotherapy	camrelizumab	PBMC	ACK	20170710	1.25	194181
HR3W0.fcs	C2	C2-0	46	Male	Yes	HBV infected	HCC	4.7	C	Sorafenib	camrelizumab	PBMC	ACK	20170613	0.43	75010
HR3W1.fcs	C2	C2-1	46	Male	Yes	HBV infected	HCC	NA	C	Sorafenib	camrelizumab	PBMC	ACK	20170620	0.69	120741
HR3W12.fcs	C2	C2-5	46	Male	Yes	HBV infected	HCC	57.4	C	Sorafenib	camrelizumab	PBMC	ACK	20170907	0.93	229252
HR3W3.fcs	C2	C2-2	46	Male	Yes	HBV infected	HCC	NA	C	Sorafenib	camrelizumab	PBMC	ACK	20170708	0.44	94008
HR3W6.fcs	C2	C2-3	46	Male	Yes	HBV infected	HCC	20.3	C	Sorafenib	camrelizumab	PBMC	ACK	20170727	1	130440
HR3W9.fcs	C2	C2-4	46	Male	Yes	HBV infected	HCC	NA	C	Sorafenib	camrelizumab	PBMC	ACK	20170818	0.9	162658
HR4W0.fcs	C3	C3-0	68	Male	Yes	HBV infected	HCC	55.8	C	Sorafenib	camrelizumab	PBMC	ACK	20170814	1	257916
HR4W1.fcs	C3	C3-1	68	Male	Yes	HBV infected	HCC	NA	C	Sorafenib	camrelizumab	PBMC	ACK	20170821	1	210156
HR4W12.fcs	C3	C3-5	68	Male	Yes	HBV infected	HCC	18.3	C	Sorafenib	camrelizumab	PBMC	ACK	20171107	0.9	346144
HR4W3.fcs	C3	C3-2	68	Male	Yes	HBV infected	HCC	NA	C	Sorafenib	camrelizumab	PBMC	ACK	20170904	0.8	268449
HR4W6.fcs	C3	C3-3	68	Male	Yes	HBV infected	HCC	15.7	C	Sorafenib	camrelizumab	PBMC	ACK	20170925	0.65	220471
HR4W9.fcs	C3	C3-4	68	Male	Yes	HBV infected	HCC	NA	C	Sorafenib	camrelizumab	PBMC	ACK	20171017	0.56	192730
HR5W0.fcs	C4	C4-0	43	Male	Yes	HBV infected	HCC	95.5	C	Chemotherapy	camrelizumab	PBMC	ACK	20170816	0.32	178775
HR5W1.fcs	C4	C4-1	43	Male	Yes	HBV infected	HCC	NA	C	Chemotherapy	camrelizumab	PBMC	ACK	20170823	0.49	159062
HR5W3.fcs	C4	C4-2	43	Male	Yes	HBV infected	HCC	NA	C	Chemotherapy	camrelizumab	PBMC	ACK	20170906	0.18	125360
HR5W6.fcs	C4	C4-3	43	Male	Yes	HBV infected	HCC	251.7	C	Chemotherapy	camrelizumab	PBMC	ACK	20170927	0.61	280029
HR5W9.fcs	C4	C4-4	43	Male	Yes	HBV infected	HCC	NA	C	Chemotherapy	camrelizumab	PBMC	ACK	20171023	0.9	93168
HR5W12.fcs	C4	C4-5	43	Male	Yes	HBV infected	HCC	694.9	C	Chemotherapy	camrelizumab	PBMC	ACK	20171113	0.6	343208
HR6W0.fcs	C5	C5-0	27	Male	Yes	HBV infected	HCC	61856.9	C	Chemotherapy	camrelizumab	PBMC	ACK	20170824	1	158264
HR6W1.fcs	C5	C5-1	27	Male	Yes	HBV infected	HCC	NA	C	Chemotherapy	camrelizumab	PBMC	ACK	20170831	1	137681
HR6W12.fcs	C5	C5-5	27	Male	Yes	HBV infected	HCC	＞80000.00	C	Chemotherapy	camrelizumab	PBMC	ACK	20171123	NA	214659
HR6W3.fcs	C5	C5-2	27	Male	Yes	HBV infected	HCC	NA	C	Chemotherapy	camrelizumab	PBMC	ACK	20170918	0.8	184075
HR6W6.fcs	C5	C5-3	27	Male	Yes	HBV infected	HCC	＞80000.00	C	Chemotherapy	camrelizumab	PBMC	ACK	20171010	0.8	247900
HR6W9.fcs	C5	C5-4	27	Male	Yes	HBV infected	HCC	NA	C	Chemotherapy	camrelizumab	PBMC	ACK	20171102	0.42	283848
NOVI1W0.fcs	N1	N1-0	59	Male	Yes	HBV infected	HCC	9.6	C	NA	nivolumab	PBMC	Ficoll	20180109	0.03	3939
NOVI1W1.fcs	N1	N1-1	59	Male	Yes	HBV infected	HCC	NA	C	NA	nivolumab	PBMC	Ficoll	20180118	0.19	23452
NOVI1W3.fcs	N1	N1-2	59	Male	Yes	HBV infected	HCC	NA	C	NA	nivolumab	PBMC	Ficoll	20180202	0.065	7900
NOVI1W6.fcs	N1	N1-3	59	Male	Yes	HBV infected	HCC	7.9	C	NA	nivolumab	PBMC	Ficoll	20180223	0.12	20162
NOVI1W8.fcs	N1	N1-4	59	Male	Yes	HBV infected	HCC	NA	C	NA	nivolumab	PBMC	Ficoll	NA	0.85	196440
NOVI1W10.fcs	N1	N1-5	59	Male	Yes	HBV infected	HCC	8	C	NA	nivolumab	PBMC	Ficoll	20180319	0.95	103163
NOVI1W12.fcs	N1	N1-6	59	Male	Yes	HBV infected	HCC	7.9	C	NA	nivolumab	PBMC	Ficoll	20180404	0.285	18092
NOVI2W0.fcs	N2	N2-0	77	Male	Yes	HBV infected	HCC	6.2	C	NA	nivolumab	PBMC	Ficoll	20180125	0.3	70542
NOVI2W2.fcs	N2	N2-1	77	Male	Yes	HBV infected	HCC	6.1	C	NA	nivolumab	PBMC	Ficoll	20180207	1	81055
NOVI2W4.fcs	N2	N2-2	77	Male	Yes	HBV infected	HCC	4.5	C	NA	nivolumab	PBMC	Ficoll	20180223	1	71427
NOVI2W6.fcs	N2	N2-3	77	Male	Yes	HBV infected	HCC	6.1	C	NA	nivolumab	PBMC	Ficoll	20180308	1	83371
NOVI2W10.fcs	N2	N2-5	77	Male	Yes	HBV infected	HCC	7.7	C	NA	nivolumab	PBMC	Ficoll	20180402	0.14	43080
NOVI2W13.fcs	N2	N2-6	77	Male	Yes	HBV infected	HCC	7.2	C	NA	nivolumab	PBMC	Ficoll	20180420	1	84750
NOVI3W0.fcs	N3	N3-0	43	Male	Yes	HBV infected	HCC	308.1	C	NA	nivolumab	PBMC	Ficoll	20180126	1.2	106182
NOVI3W02.fcs	N3	N3-1	43	Male	Yes	HBV infected	HCC	407.7	C	NA	nivolumab	PBMC	Ficoll	20180207	1.7	97595
NOVI3W04.fcs	N3	N3-2	43	Male	Yes	HBV infected	HCC	453.3	C	NA	nivolumab	PBMC	Ficoll	20180223	1.2	111689
NOVI3W13.fcs	N3	N3-6	43	Male	Yes	HBV infected	HCC	1733.4	C	NA	nivolumab	PBMC	Ficoll	20180420	1.7	77827
NOVI3W18.fcs	N3	N3-7	43	Male	Yes	HBV infected	HCC	3259.1	C	NA	nivolumab	PBMC	Ficoll	20180529	1.26	125420
NOVI4W0.fcs	N4	N4-0	56	Male	Yes	HBV infected	HCC	24	C	NA	nivolumab	PBMC	Ficoll	20180209	1.2	90538
NOVI4W2.fcs	N4	N4-1	56	Male	Yes	HBV infected	HCC	7.7	C	NA	nivolumab	PBMC	Ficoll	20180223	0.8	62896
NOVI4W4.fcs	N4	N4-2	56	Male	Yes	HBV infected	HCC	NA	C	NA	nivolumab	PBMC	Ficoll	20180305	1.2	72972
NOVI4W6.fcs	N4	N4-3	56	Male	Yes	HBV infected	HCC	2.3	C	NA	nivolumab	PBMC	Ficoll	20180321	1.2	105347
NOVI4W10.fcs	N4	N4-5	56	Male	Yes	HBV infected	HCC	NA	C	NA	nivolumab	PBMC	Ficoll	20180417	1.2	73249
NOVI4W12.fcs	N4	N4-6	56	Male	Yes	HBV infected	HCC	1.8	C	NA	nivolumab	PBMC	Ficoll	20180504	0.95	74703
NOVI5W0.fcs	N5	N5-0	51	Male	Yes	HBV infected	HCC	325.3	C	NA	nivolumab	PBMC	Ficoll	20180209	0.9	123619
NOVI5W2.fcs	N5	N5-1	51	Male	Yes	HBV infected	HCC	242.2	C	NA	nivolumab	PBMC	Ficoll	20180223	1.2	99429
NOVI5W6.fcs	N5	N5-3	51	Male	Yes	HBV infected	HCC	1.4	C	NA	nivolumab	PBMC	Ficoll	20180321	0.86	213848
NOVI5W10.fcs	N5	N5-5	51	Male	Yes	HBV infected	HCC	NA	C	NA	nivolumab	PBMC	Ficoll	20180417	1.2	118061
NOVI5W12.fcs	N5	N5-6	51	Male	Yes	HBV infected	HCC	1.3	C	NA	nivolumab	PBMC	Ficoll	20180504	0.9	206030
Note: AFP, α-fetoprotein; BCLC, Barcelona Clinic Liver Cancer; PBMC, Peripheral blood mononuclear cell; TACE, Transarterial chemoembolization

## Sheet: HD
Demographic and clinical characteristics of healthy donors enrolled in this study
FCS file name	Healthy donor ID	Gender	Age	AFP (ng/ml)	Sample type	Processing buffer	Sampling time	Average live cell counts (×10^6 cells)	Average dead cell counts (*10^6 cells)	Total cell counts (*10^6 cells)	Viability (%)	Cell counts for CYTOF (*10^6)	Available cell counts
B001.fcs	HD1	Female	36	1.6	PBMC	Ficoll	20210708	10.57	0.1591	10.7291	98.5171	1	122750
B002.fcs	HD2	Female	38	4	PBMC	Ficoll	20210708	8.865	0.17	9.035	98.1184	1	123149
B003.fcs	HD3	Female	35	3	PBMC	Ficoll	20210708	12.47	0.344	12.814	97.3154	1	203787
B004.fcs	HD4	Female	30	3	PBMC	Ficoll	20210708	12.13	0.2288	12.3588	98.1487	0.6	121485
B005.fcs	HD5	Male	47	2	PBMC	Ficoll	20210708	9.26	0.356	9.616	96.2978	0.6	175529
B006.fcs	HD1	Female	36	1.6	PBMC	ACK	20210708	28	0.4	28.4	98.5915	1	353605
B007.fcs	HD2	Female	38	4	PBMC	ACK	20210708	30	0.6	30.6	98.0392	1	256399
B008.fcs	HD3	Female	35	3	PBMC	ACK	20210708	38.8	0.8	39.6	97.9798	1	293984
B009.fcs	HD4	Female	30	3	PBMC	ACK	20210708	13.4	0.6	14	95.7143	0.82	394157
B010.fcs	HD5	Male	47	2	PBMC	ACK	20210708	15	0.48	15.48	96.8992	0.82	234140

## Sheet: CRC
Demographic and clinical characteristics of patients with colorectal cancer enrolled in this study
FCS file name	Patient ID	Gender	Age	Diagnosis	CEA (ng/ml)	AJCC stage	Sample type	Processing buffer	Sampling time	Average live cell counts (×10^6 cells)	Average dead cell counts (*10^6 cells)	Total cell counts (*10^6 cells)	Viability (%)	Cell counts for CYTOF (*10^6)	Available cell counts
B011.fcs	CRC1	Female	51	colorectal cancer	1.3	IIIB	PBMC	ACK	20210713	22.5	0.5	23	97.83	1.4	301746
B012.fcs	CRC2	Male	72	colorectal cancer	14.3	IIA	PBMC	ACK	20210714	58.5	0.9	59.4	98.48	1.36	305808
B014.fcs	CRC3	Female	53	colorectal cancer	1.8	IIIA	PBMC	ACK	20210716	29.4	2.1	31.5	93.33	1	270909
B015.fcs	CRC4	Male	54	colorectal cancer	2.7	I	PBMC	ACK	20210719	23.25	2	25.25	92.08	0.6	25577
B016.fcs	CRC5	Female	42	colorectal cancer	16.4	IIIB	PBMC	ACK	20210721	26.2	0.4	26.6	98.5	1.06	268050
Note: The staging system is American Joint Committee on Cancer (AJCC) - 8th; CEA, carcinoembryonic antigen
