# Supplementary material
Source: HighWire-hosted journal article supplement (https://jitc.bmj.com/content/10/1/e003133)
Supplement: inline-supplementary-material-3 [file inline-supplementary-material-3.xlsx]

## Sheet: Sheet1
Supplementary Table 2. Marker panel
Marker panel for samples processed with ACK
List	Label	Marker	Clone	Dilution	Company
1	89Y	CD45	HI30	400	Fluidigm
2	107/109Ag	CD69	FN50	100	Biolegend
3	115ln	CD3	UCHTI	100
4	139La	CD68	Y1/82A	50	Biolegend
5	141Pr	CD56	NCAM16.2	800	BD
6	142Nd	CD19-TCRγδ	HIB19, 5A6E9	400100	Biolegend
7	143Nd	CD27	O323	100	Biolegend
8	144Nd	CD14	M5E2	100	Biolegend
9	145Nd	IgD	IA6-2	400	Biolegend
10	146Nd	IL-3Rα (CD123)	6H6	400	Biolegend
11	147Sm	CD15	W6D3	100	Biolegend
12	148Nd	CD33	WM53	400	Biolegend
13	149Sm	CD25 - Fluidigm	2A3	200	Fluidigm
14	150Nd	LAG-3 - Fluidigm	874501	100	Fluidigm
15	151Eu	CD38	HIT2	100	Biolegend
16	152Sm	CD103	B-Ly7	100	eBioscience
17	153Eu	CD274 (PD-L1)	29E.2A3	100	Biolegend
18	154Sm	CD163	GHI/61	50
19	155Gd	CD45RA	HI100	800	Biolegend
20	156Gd	CD24	ML5	100	Biolegend
21	157Gd	CD172a/b (SIRPα/β)	SE5A5	200	Biolegend
22	158Gd	CD197 (CCR7)	G043H7	50	Biolegend
23	159Tb	CD11c	BU15	200	Biolegend
24	160Gd	CD28	CD28.2	100	Biolegend
25	161Dy	CTLA-4 - Fluidigm	14D3	100	Fluidigm
26	162Dy	FOXP3 - Fluidigm	PCH101	100	Fluidigm
27	163Dy	CD49a	TS2/7	100	Biolegend
28	164Dy	CD95	DX2	100	Biolegend
29	165Ho	Tim-3	F38-2E2	50	Biolegend
30	166Er	TCR Vα7.2	3C10	100	Biolegend
31	167Er	CD278 (ICOS)	C398.4A	100	Biolegend
32	168Er	T-bet	4B10	100	Biolegend
33	169Tm	Ki-67	Ki67	100	Biolegend
34	170Er	IL-7Rα (CD127)	A019D5	100	Biolegend
35	171Yb	CXCR5 - Fluidigm	RF8B2	100	Fluidigm
36	172Yb	CD273 (PD-L2)	24F.10C12	100	Biolegend
37	173Yb	CD154 (CD40L)	24-31	100	Biolegend
38	174Yb	CD279 (PD-1)	EH12.2H7	100	Biolegend
39	175Lu	CD16	3G8	400	Biolegend
40	176Yb	HLA-DR	L243	100	Biolegend
41	197gd	CD4	RPA-T4	400	Biolegend
42	198pt	CD8a	RPA-T8	800	Biolegend
43	209Bi	CD11b - Fluidigm	ICRF44	200	Fluidigm
44	191-193	Intercalator-Ir		4000	Fluidigm
45	194pt	live/dead		4000

## Sheet: Sheet2
Marker panel for samples processed with Ficoll
List	Label	Marker	Clone	Dilution	Company
1	89Y	CD45	HI30	100	Fluidigm
2	115ln	CD3	UCHTI	200	BioXcell
3	139La	CD68	Y1/82A	200	BioLegend
4	141Pr	CD56	NCAM16.2	400	BD
5	142Nd	CD19	HIB19	800	BioLegend
6	142Nd	TCRγδ	5A6E9	100	homemade
7	143Nd	CD27	O323	400	BioLegend
8	144Nd	CD14	M5E2	100	BioLegend
9	145Nd	IgD	IA6-2	800	BioLegend
10	146Nd	IL-3Rα (CD123)	6H6	400	BioLegend
11	147Sm	CD15	W6D3	100	BioLegend
12	148Nd	CD33	WM53	800	BioLegend
13	149Sm	CD25	2A3	200	Fluidigm
14	150Nd	LAG-3	874501	50	Fluidigm
15	151Eu	CD38	HIT2	100	BioLegend
16	152Sm	CD103	B-Ly7	100	eBioscience
17	153Eu	CD274 (PD-L1)	29E.2A3	400	BioLegend
18	154Sm	CD163	GHI/61	200	BioLegend
19	155Gd	CD45RA	HI100	200	BioLegend
20	156Gd	CD24	ML5	50	BioLegend
21	157Gd	CD172a/b (SIRPα/β)	SE5A5	100	BioLegend
22	158Gd	CD197 (CCR7)	G043H7	100	BioLegend
23	159Tb	CD11c	BU15	400	BioLegend
24	160Gd	CD28	CD28.2	200	BioLegend
25	161Dy	CTLA-4	14D3	400	Fluidigm
26	162Dy	FOXP3	PCH101	100	Fluidigm
27	163Dy	CD49a	TS2/7	100	BioLegend
28	164Dy	CD95	DX2	100	BioLegend
29	165Ho	Tim-3	F38-2E2	100	BioLegend
30	166Er	TCR Vα7.2	3C10	200	BioLegend
31	167Er	CD278 (ICOS)	C398.4A	100	BioLegend
32	168Er	T-bet	4B10	200	BioLegend
33	169Tm	Ki-67	Ki67	100	BioLegend
34	170Er	IL-7Rα (CD127)	A019D5	100	BioLegend
35	171Yb	EOMES		100	BioLegend
36	172Yb	CD273 (PD-L2)	24F.10C12	400	BioLegend
37	173Yb	CD154 (CD40L)	24-31	50	BioLegend
38	174Yb	CD279 (PD-1)	EH12.2H7	100	BioLegend
39	175Lu	CD16	3G8	100	BioLegend
40	176Yb	HLA-DR	L243	100	BioLegend
41	197gd	CD4	RPA-T4	400	BioLegend
42	198pt	CD8a	RPA-T8	800	BioLegend
43	209Bi	CD11b	M1/70	400	Fluidigm
